# Supplementary material
Source: publisher figshare collection journal article supplement (https://acs.figshare.com/ndownloader/files/8516855)
Supplement: Supplementary file 1 [file 8516855]

# A-site Cation Bulk and Surface Diffusion in A-site-deficient BaZrO<sub>3</sub> and SrZrO<sub>3</sub> Perovskites

Akira Yoko<sup>a,\*</sup>, Junjie Wang<sup>b,c</sup>, Naoto Umezawa<sup>b</sup>, Takahisa Ohno<sup>b</sup>, Yoshito Oshima<sup>a</sup>

<sup>a</sup>*Department of Environment Systems, Graduate School of Frontier Sciences, The University of Tokyo, Kashiwanoha 5-1-5, Kashiwa, Chiba 277-8563, Japan*

<sup>b</sup>*International Center for Materials Nanoarchitectonics (MANA), National Institute for Materials Science, 1-1 Namiki, Tsukuba, Ibaraki 305-0044, Japan*

<sup>c</sup>*Materials Research Center for Element Strategy, Tokyo Institute of Technology, 4259 Nagatsuta-cho, Midori-ku, Yokohama, Kanagawa 226-8503, Japan*

## Supplementary Information

(A)

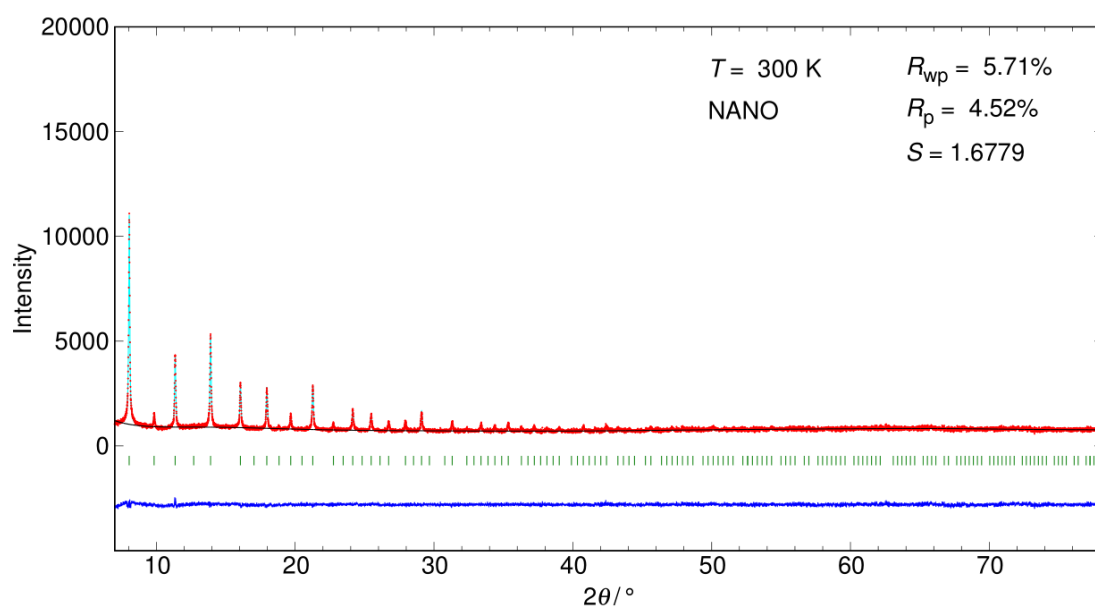

(B)

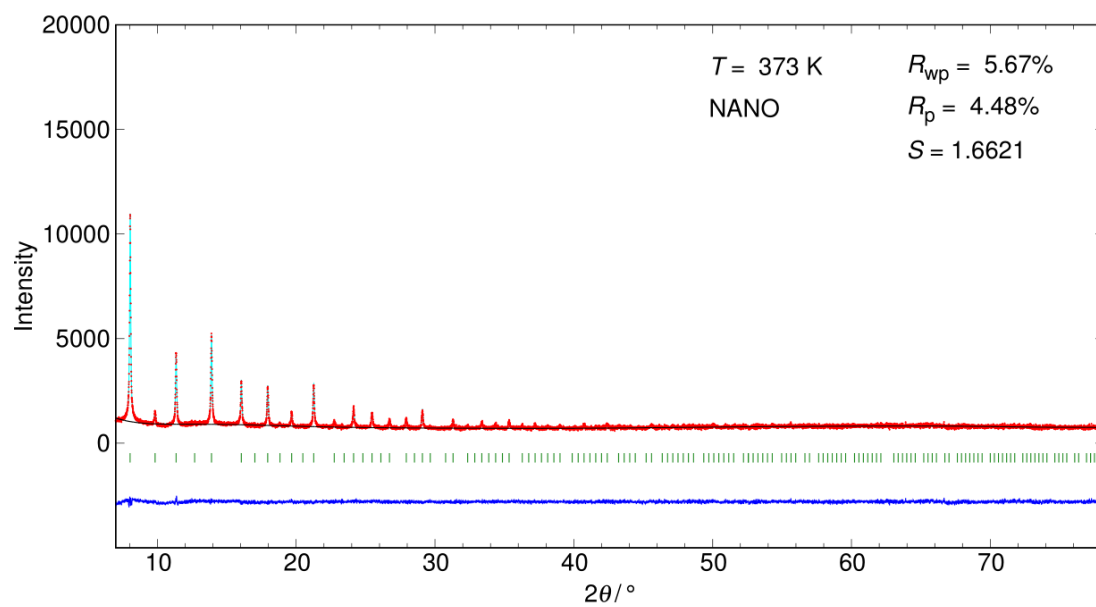

(C)

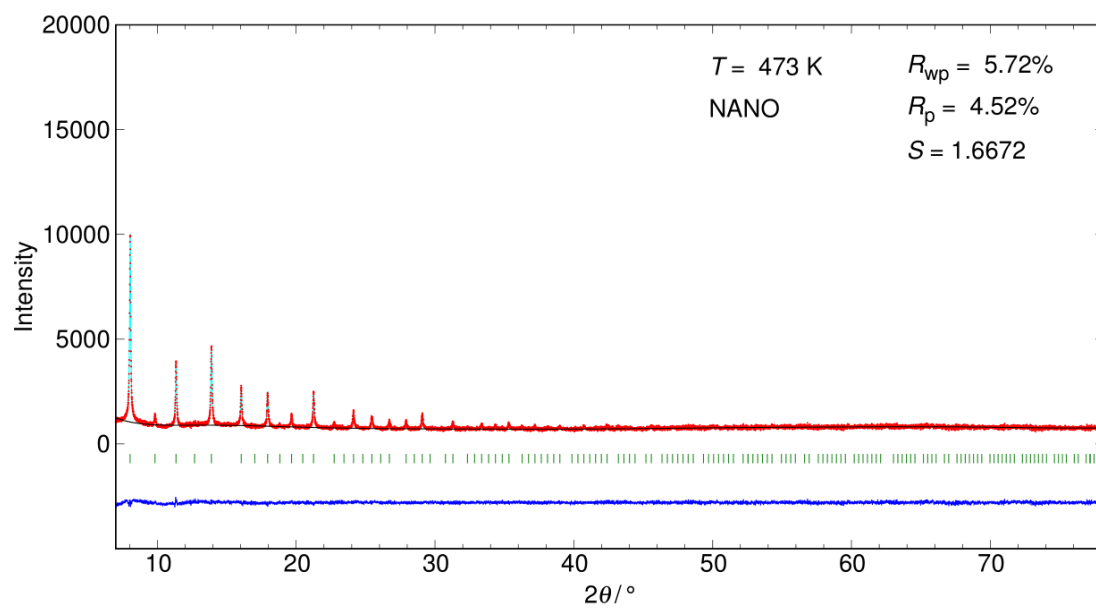

(D)

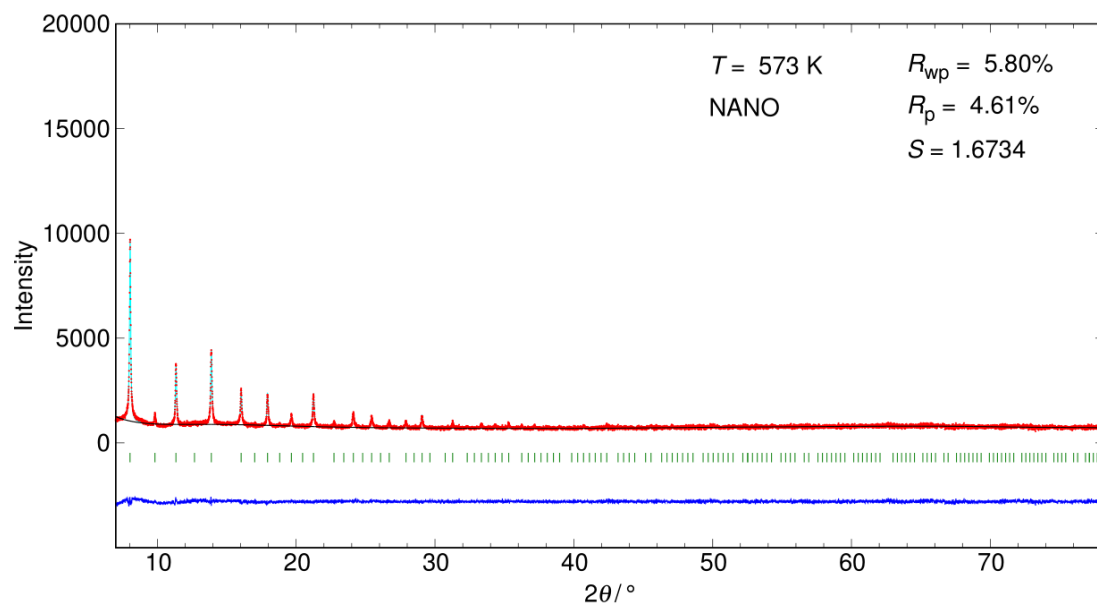

(E)

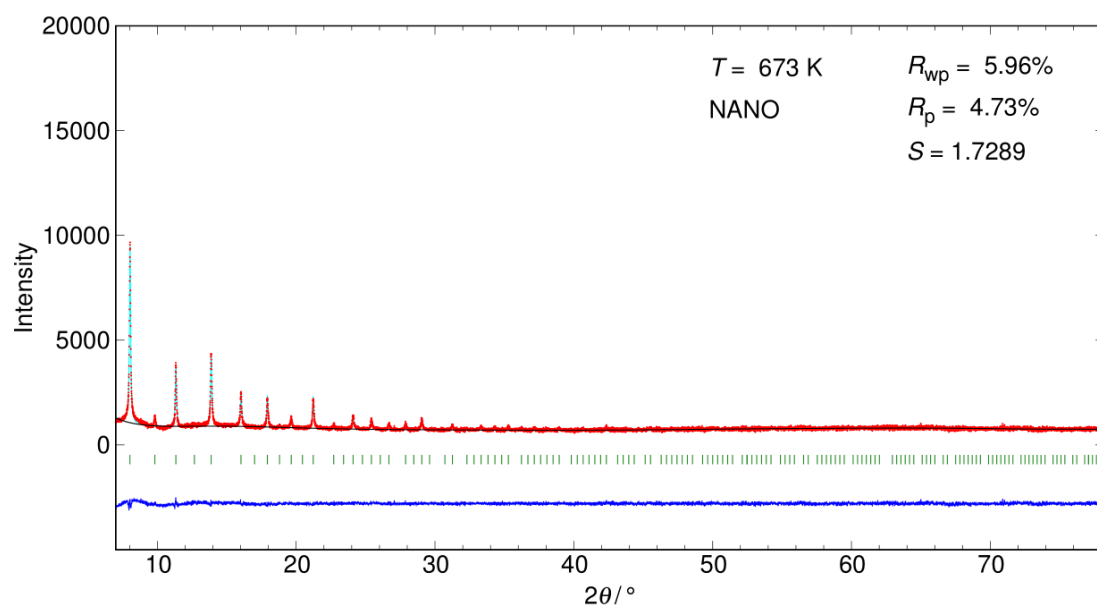

(F)

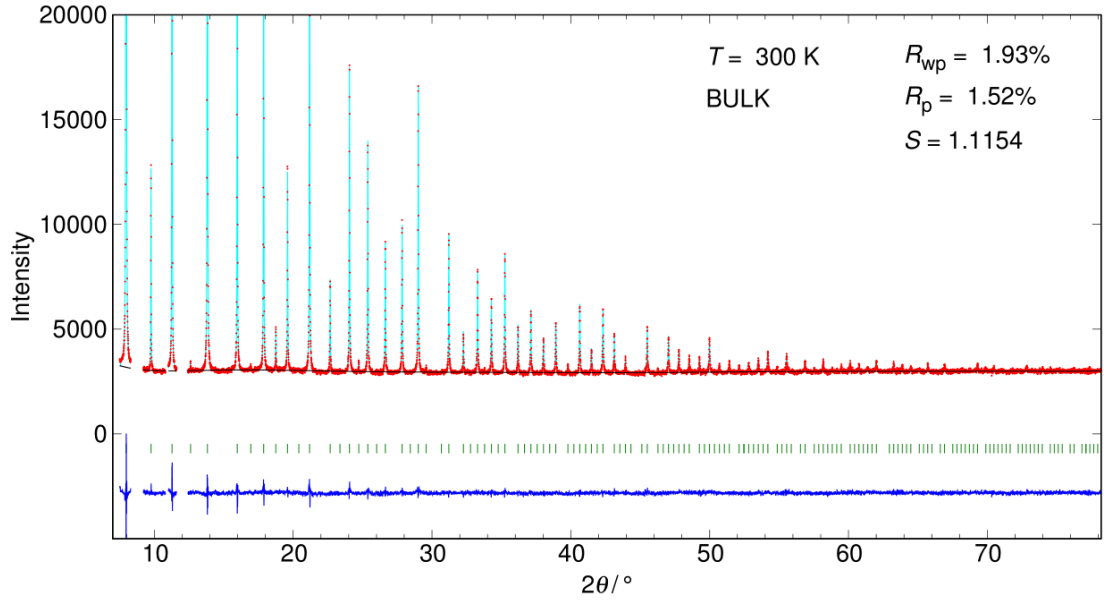

(G)

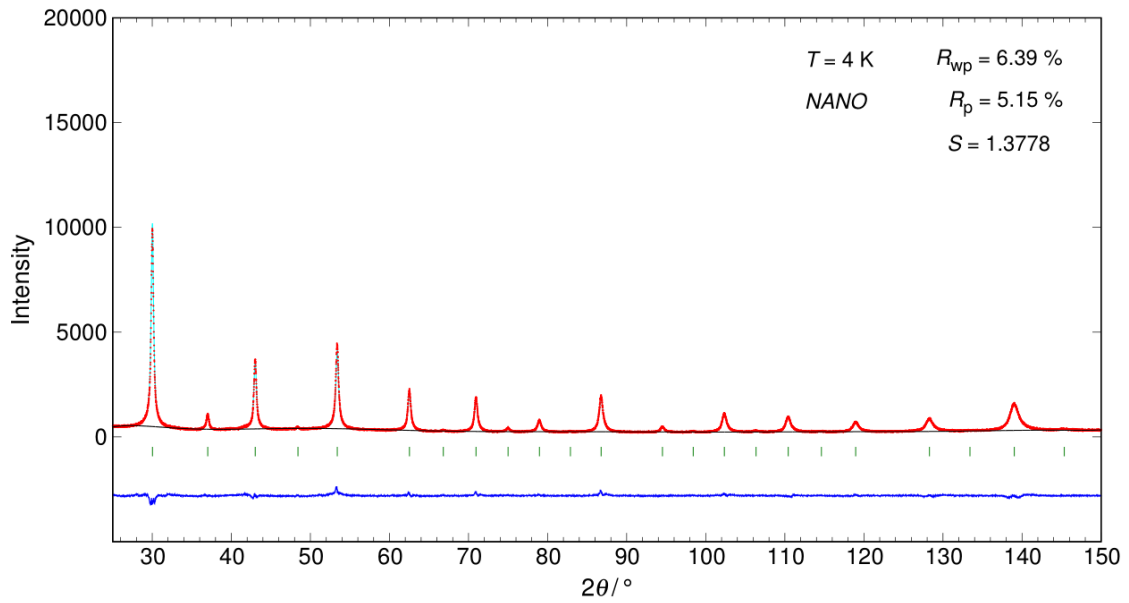

**Figure S1** Synchrotron X-ray diffraction and Rietveld fitting results for BaZrO<sub>3</sub> nanoparticles at (A) 300 K, (B) 373 K, (C) 473 K, (D) 573 K, and (E) 673 K, and (F) bulk BaZrO<sub>3</sub> at 300 K. (G) CuKα1 characteristic X-ray for low temperature (4 K) diffraction for nano. The red plots represent experimental diffraction patterns, the light blue lines show the fitting patterns, and the black line is the refined background. The vertical bars show the peak positions of BaZrO<sub>3</sub> (space group 221, Pm-3m) and the blue curve beneath it shows the fitting residues.

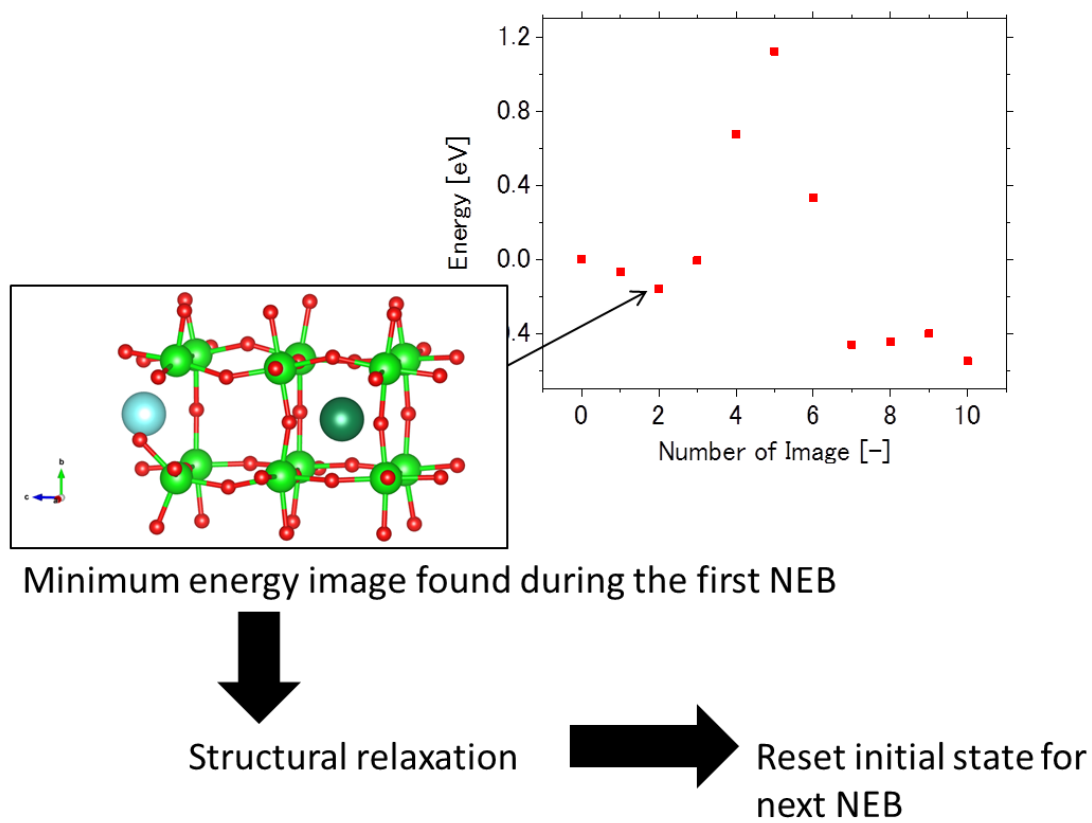

**Figure S2** Iteration process of NEB calculations when more stable configurations than the initial one are found.
